# Supplementary material for: Genome-Wide Identification and Characterization of R2R3-MYB Provide Insight into Anthocyanin Biosynthesis Regulation Mechanism of Ananas comosus var. bracteatus
Source: MDPI journal article supplement (doi:10.3390/ijms24043133), 2023-02-05
Supplement: s1 [file s1]

## *Supplementary Material*

### Supplementary Figures

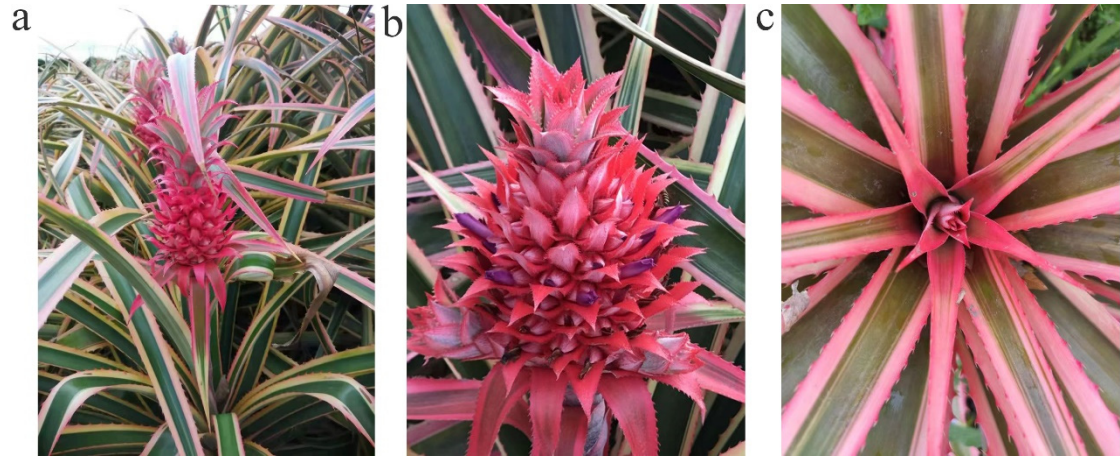

**Supplementary Figure S1.** The red Phenotype of different tissues in *Ananas comosus* var. *bracteatus*

| A                             | Helix 1 |        | Helix 2 |     | Helix 3 |         |
|-------------------------------|---------|--------|---------|-----|---------|---------|
|                               | *       | 20     | *       | 40  | *       |         |
| Aco_HBLgroup6g007080/76-348   | : CARGH | RPAAE  | AKL     | EL  | SSQY    | : FQNNL |
| Aco_HBLgroup14g001960/35-500  | : LVKGS | THEE   | NKLI    | HL  | KKHG    | : QSK   |
| Aco_HBLgroup19g007590/21-278  | : LRGGP | NTVEE  | ELI     | LV  | NYIT    | : AHG   |
| Aco_HBLgroup13g006020/14-225  | : --NKG | ANTKEE | DER     | LI  | AHRE    | : HGC   |
| Aco_HBLgroup19g006990/12-344  | : LKKG  | RTAEE  | EEI     | LV  | KYIT    | : THG   |
| Aco_HBLgroup8g005940/34-310   | : VKG   | PTADE  | EEV     | LS  | YV      | : RREG  |
| Aco_HBLgroup11g000160/14-358  | : LNKGS | NTPEE  | DMR     | LI  | AY      | : HKY   |
| Aco_HBLgroup13g006350/12-241  | : VKRGP | NTAEE  | EKK     | LI  | GL      | : LFL   |
| Aco_HBLgroup22g003930/16-284  | : --KGP | NTPEE  | DI      | TV  | SY      | : QEHG  |
| Aco_HBLgroup17g0010760/12-258 | : QNKGS | SVSEE  | EKI     | LEY | KL      | : HGC   |
| Aco_HBLgroup1g007530/122-428  | : VVKG  | NTAEE  | ERL     | LV  | QL      | : DQHG  |
| Aco_HBLgroup15g004150/12-235  | : VKRGP | NSPEE  | EAI     | RS  | YV      | : EMT   |
| Aco_HBLgroup16g006310/12-316  | : VKKGP | NSPEE  | EAK     | LI  | YEE     | : HGT   |
| Aco_HBLgroup5g000200/70-513   | : LVKGP | NSKOE  | EII     | IQ  | MY      | : KKY   |
| Aco_HBLgroup13g0010320/16-313 | : --KGP | NTPEE  | EKL     | VE  | YQ      | : KNC   |
| Aco_HBLgroup11g004390/23-325  | : LKKG  | PTAAB  | EEL     | TE  | YV      | : RREG  |
| Aco_HBLgroup4g005510/16-185   | : --KGP | NTPEE  | EKK     | LI  | QY      | : QKHG  |
| Aco_HBLgroup4g002400/2-228    | : CTRGH | NRPEE  | EKK     | LI  | QY      | : QKHG  |
| Aco_HBLgroup22g007150/28-338  | : LRKGL | NSPEE  | DDK     | LS  | MY      | : LSHG  |
| Aco_HBLgroup17g0010760/16-310 | : CPBGH | NRPEE  | EKK     | LI  | QY      | : QKHG  |
| Aco_HBLgroup19g011910/16-294  | : --KGP | NTPEE  | EII     | LV  | SY      | : QEHG  |
| Aco_HBLgroup15g005990/12-269  | : LRKGL | NSPEE  | EKK     | LI  | YEE     | : HGT   |
| Aco_HBLgroup24g005180/13-195  | : --NKG | ANTKEE | DER     | LI  | AY      | : QAHG  |
| Aco_HBLgroup12g001980/14-256  | : --KGP | NTPEE  | ELM     | LV  | SY      | : QEHG  |
| Aco_HBLgroup13g003940/13-276  | : YRKGL | NSPEE  | QDR     | LD  | Y       | : LSHG  |
| Aco_HBLgroup11g006600/155-450 | : VVKG  | NTLEE  | ERL     | LV  | QL      | : DQHG  |
| Aco_HBLgroup18g003400/16-290  | : --KGP | NTPEE  | EKK     | LI  | QY      | : QKHG  |
| Aco_HBLgroup13g009340/12-345  | : VKRGL | NSPEE  | EKK     | LI  | YEE     | : HGT   |
| Aco_HBLgroup16g004820/84-364  | : CVRGH | NRPAE  | ESK     | REL | V       | : SQFG  |
| Aco_HBLgroup23g002090/12-329  | : VKKGP | NTAEE  | EAK     | LI  | YEE     | : HGT   |
| Aco_HBLgroup6g005640/3-277    | : RIKGP | NSPEE  | EEL     | QRL | V       | : QEHG  |
| Aco_HBLgroup10g001000/14-264  | : --NKG | ANTKEE | DER     | LI  | AY      | : QAHG  |
| Aco_HBLgroup1g005280/16-303   | : --KGP | NTPEE  | EII     | LV  | SY      | : QEHG  |
| Aco_HBLgroup13g003660/14-275  | : LRGGP | NTVEE  | ELI     | LV  | NYIT    | : AHG   |
| Aco_HBLgroup11g003980/11-332  | : VKRGL | NSPEE  | EKK     | LI  | YEE     | : HGT   |
| Aco_HBLgroup5g009070/171-514  | : VVKG  | NTLEE  | ERL     | LV  | QL      | : DQHG  |
| Aco_HBLgroup19g011660/64-266  | : CSRGH | NRPAE  | ESK     | REL | V       | : SQFG  |
| Aco_HBLgroup3g004490/53-297   | : --NKG | ANTKEE | DER     | LI  | AY      | : QAHG  |
| Aco_HBLgroup13g0010580/12-256 | : LNRGA | TSHEE  | EKL     | SE  | YV      | : MAHG  |
| Aco_HBLgroup7g004270/12-219   | : VKRGP | NTAEE  | EKK     | LI  | YEE     | : HGT   |
| Aco_HBLgroup7g000370/16-355   | : --KGP | NTPEE  | EKK     | LI  | QY      | : QKHG  |
| Aco_HBLgroup22g005280/1-1225  | : --    |        |         |     |         |         |
| Aco_HBLgroup8g001710/421-705  | : --DKG | VS     | SKPE    | EKA | E       | : CHVHG |
| Aco_HBLgroup17g010700/12-258  | : QNKGS | SVSEE  | EKI     | LEY | KL      | : HGC   |
| Aco_HBLgroup25g003080/12-231  | : LKKG  | PTAEE  | QII     | LI  | SY      | : QKYG  |
| Aco_HBLgroup18g005320/12-290  | : LKKG  | PTAEE  | EKK     | LI  | YEE     | : HGT   |
| Aco_HBLgroup1g005410/64-362   | : CORGH | NRVPE  | EAK     | REL | V       | : SQFG  |
| Aco_HBLgroup17g008760/16-313  | : --KGP | NTPEE  | EKK     | LI  | QY      | : QKHG  |
| Aco_HBLgroup17g007040/12-212  | : LKKG  | PTAEE  | EKK     | LI  | YEE     | : HGT   |
| Aco_HBLgroup9g002390/12-233   | : VKKGP | NTPEE  | RI      | LV  | DY      | : QRYG  |
| Aco_HBLgroup11g002560/14-204  | : --NKG | ANTKEE | DER     | LI  | AY      | : QAHG  |
| Aco_HBLgroup7g010980/12-334   | : VKKGP | NSPEE  | EAK     | LI  | YEE     | : HGT   |
| Aco_HBLgroup8g002040/20-328   | : LRGGP | NTLEE  | ELM     | LV  | SY      | : QEHG  |
| Aco_HBLgroup13g003150/12-316  | : VKKGP | NSPEE  | EKK     | LI  | YEE     | : HGT   |
| Aco_HBLgroup8g005730/12-248   | : VKRGP | NSPEE  | DA      | RS  | YV      | : EKHG  |
| Aco_HBLgroup9g005260/17-360   | : --KGP | NTPEE  | EKK     | LI  | QY      | : QKHG  |
| Aco_HBLgroup1g003700/12-401   | : LRKGL | NSPEE  | EKK     | LI  | YEE     | : HGT   |
| Aco_HBLgroup16g004940/133-411 | : CVRGH | NRPAE  | ESK     | REL | V       | : SQFG  |
| Aco_HBLgroup17g010750/12-215  | : LSRGP | NTVEE  | RI      | LV  | DY      | : QRYG  |
| Aco_HBLgroup19g008140/12-418  | : LRKGL | NSPEE  | EKK     | LI  | YEE     | : HGT   |
| Aco_HBLgroup22g001340/2-235   | : CTRGH | NRPEE  | EKK     | LI  | QY      | : QKHG  |
| Aco_HBLgroup25g001110/12-341  | : VKKGP | NSPEE  | EAK     | LI  | YEE     | : HGT   |
| Aco_HBLgroup25g004340/13-355  | : CRKGL | NSPEE  | LRK     | RD  | Y       | : LRYG  |
| Aco_HBLgroup16g004760/79-411  | : --KGP | NTPEE  | EKK     | LI  | QY      | : QKHG  |
| Aco_HBLgroup25g006490/14-288  | : LNKGS | NTODE  | EAR     | LI  | AY      | : QAHG  |
| Aco_HBLgroup22g004000/31-467  | : RHIVT | TPQED  | DL      | RE  | Q       | : ALHG  |
| Aco_HBLgroup14g001220/40-460  | : LKKG  | PTAEE  | EAI     | LD  | Y       | : VKKHG |
| Aco_HBLgroup21g005210/3-276   | : RIKGP | NSPEE  | EAL     | QRL | V       | : QKHG  |
| Aco_HBLgroup22g008830/42-270  | : GSKVP | NSPEE  | EKK     | LI  | YEE     | : HGT   |
| Aco_HBLgroup2g003160/39-479   | : LKKG  | PTADE  | ESI     | SE  | V       | : EKF   |
| Aco_HBLgroup9g0010670/13-298  | : YRKGL | NSPEE  | QDR     | LD  | Y       | : LRYG  |
| Aco_HBLgroup14g000300/3-257   | : LRGGP | NTVEE  | ELI     | LV  | NYIT    | : AHG   |
| Aco_HBLgroup20g008650/16-347  | : --KGP | NTPEE  | EKL     | TD  | Y       | : QQNG  |
| Aco_HBLgroup22g008830/2-235   | : CTRGH | NRPEE  | EKK     | LI  | QY      | : QKHG  |
| Aco_HBLgroup19g010220/10-257  | : RIKGS | NSPEE  | EAM     | T   | Q       | : LKDHG |
| Aco_HBLgroup2g000460/60-369   | : RVKGP | NSPEE  | EAV     | LS  | YV      | : SKFG  |
| Aco_HBLgroup9g004500/23-269   | : VNKGA | NTAEE  | EKK     | LI  | YEE     | : HGT   |
| Aco_HBLgroup21g003230/25-397  | : MKKGP | NTAEE  | EAI     | LD  | Y       | : VRKHG |
| Aco_HBLgroup9g004120/16-270   | : --KGP | NTPEE  | EEL     | LV  | SY      | : QEHG  |
| Aco_HBLgroup25g002270/16-279  | : WRKGP | NTSEED | EKL     | MQ  | HN      | : QHGC  |
| Aco_HBLgroup6g005750/12-364   | : LRKGL | NSPEE  | EKK     | LI  | YEE     | : HGT   |
| Aco_HBLgroup6g004420/12-272   | : VKKGP | NSPEE  | EAK     | LI  | YEE     | : HGT   |
| Aco_HBLgroup2g007150/12-361   | : LRKGL | NSPEE  | EKK     | LI  | YEE     | : HGT   |
| Aco_HBLgroup20g008660/17-347  | : LKKG  | RSKEE  | EII     | LV  | SY      | : ISANG |
| Aco_HBLgroup16g005090/16-270  | : --KGP | NTPEE  | ELM     | LV  | SY      | : QEHG  |
| Aco_HBLgroup17g006470/111-416 | : LKKG  | PTMAEE | EEL     | LE  | V       | : VRSHG |
| Aco_HBLgroup2g004610/45-277   | : LRGGP | NTVEE  | ELM     | LV  | NYIT    | : AHG   |
| Aco_HBLgroup17g010710/12-215  | : LSRGP | NTVEE  | RI      | LV  | DY      | : QRYG  |
| Aco_HBLgroup20g008660/17-347  | : --KGP | NTPEE  | EEL     | LV  | SY      | : QEHG  |
| Aco_HBLgroup24g000350/13-281  | : LRKGL | NSPEE  | EKK     | LI  | YEE     | : HGT   |
| Aco_HBLgroup17g007460/16-317  | : --KGP | NTPEE  | EKK     | LI  | QY      | : QKHG  |
| Aco_HBLgroup1g005020/19-131   | : LRKGP | NTAEE  | ERI     | RE  | Y       | : TKHG  |

B

60 Helix 1 80 Helix 2 100 Helix 3

Aco\_HBLgroup6g007080/76-348 : R-SFGEEERLMAAHRLYGNKWAIALRLFEGRTDNAVKNHGHVIMARRQR  
Aco\_HBLgroup14g001960/35-500 : D-AWTEEEIKLINARVHGNGKWAELAKLPGRTDSEIKNHGNCSSKKKFFD  
Aco\_HBLgroup19g007590/21-278 : G-NIPPEEQILLLELHSRWGNRWSKIARLPGRTDNEIKNYQRIRVQAHAK  
Aco\_HBLgroup13g006020/14-225 : G-NFSLDEDDLIKLSLGNKWSLIARLPGRTDNEIKNYQNTHRKRLR  
Aco\_HBLgroup19g006990/12-344 : G-NISQEEEMIVKLHATLGNRWSLIAGHLPGRDNEIKNYQNSHLSKRLH  
Aco\_HBLgroup8g005940/34-310 : G-PIAPDEEDLILRLHRLGNRWSLIAGRIPGRDNEIKNYQNTHSKKLI  
Aco\_HBLgroup11g000160/14-358 : G-NFTQEEETLIKLDLGNKWSKIASCLPGRTDNEIKNYQNTHSKKRLA  
Aco\_HBLgroup13g006350/12-241 : G-LLDABEQIVIDLHARLGNKWSKIAKLPGRTDNEIKNHQNTHSKKKLI  
Aco\_HBLgroup2g006490/12-158 : G-SFSQEEESLIIDLHALLGNRWSQLARLPGRTDNEIKNFQNSCCKKRLR  
Aco\_HBLgroup22g003930/16-284 : G-NFTDQEEKLIHQLALLGNRWAAIASYLPERTDNDIKNYQNTYKKKLLK  
Aco\_HBLgroup17g010760/12-258 : G-NISDDEVELLIKLHKLLGNRWSLIARRLPGRDNEIKNYQNTHSKKAE  
Aco\_HBLgroup1g007530/122-428 : E-TWTEEEERMLVEAKKFGKNAELAKHVPGRSESEIKNHQNTATKRRQNA  
Aco\_HBLgroup15g004150/12-235 : G-GFTEEDDTICSYNSISGRWSIIASKLPGRDNDIKNYQNTKPKKRLI  
Aco\_HBLgroup16g006310/12-316 : G-GFSEEDDRIICSYISIGSRWSIIAQLPGRTDNDIKNYQNTKPKKLL  
Aco\_HBLgroup5g000200/70-513 : E-AWQDEEIALTHAQIYGNKWAELTKFLPGRTDNEIKNHQNSVKKKLLD  
Aco\_HBLgroup17g010320/60-313 : G-RFAEEEEKLIHLSVLGNKWSLIARLPGRTDNEIKNHQNTHSKKLI  
Aco\_HBLgroup11g004390/23-325 : G-SFTPEEELVHARLHAQLGNKWAALMASQLPGRTDNEIKNYQNTKPKHRR  
Aco\_HBLgroup4g005510/16-185 : G-KFSSEEBQTIHLSLGNKWSAIAIHLPGRTDNEIKNFQNTHSKKKLI  
Aco\_HBLgroup4g002400/2-228 : S-PFTEEEERLLASHRIYGNRWAAIARHFEGRDNAVKNHGHVIMARRCR  
Aco\_HBLgroup22g007150/28-338 : G-AFSQEEELIHLHSLGNRWSQLARLPGRTDNEIKNFQNSTHKKRLR  
Aco\_HBLgroup17g002480/16-310 : R-PFTEEEERLLAAHRVHGNGKWAIALRLFEGRTDNAVKNHGHVIMARRHR  
Aco\_HBLgroup19g011910/16-294 : G-NFTPHEEGMIVHQLSLGNRWAAIASYLPGRDNDIKNYQNTHSKKKIK  
Aco\_HBLgroup15g005990/12-269 : G-SFSQEEEDLIILHAILGNRWSQLASQLPGRTDNEIKNYQNSCCKKRLR  
Aco\_HBLgroup18g003400/16-290 : G-NIPPEEQMLIMDLHARWGNRWSKIARQLPGRTDNEIKNYQRIRVQKVKV  
Aco\_HBLgroup12g001980/14-256 : G-NFTDEEDLIKHLGLLGNKWSLIARLPGRTDNEIKNYQNTHSKKRL  
Aco\_HBLgroup13g007750/16-316 : G-NFTDQEEKLIHQLALLGNRWAAIASYLPERTDNDIKNYQNTYKKKLLK  
Aco\_HBLgroup13g003940/13-276 : G-IFSQEEEQIVMSLAQLGNKWSKIAHLPGRDNEVKNYQNSYKKRVA  
Aco\_HBLgroup11g006600/155-450 : D-TWSEEDDRIILQAITEVGNKWAELAKRLPGRTDNEIKNHQNTATKRRQFT  
Aco\_HBLgroup18g003400/16-290 : G-KFSQEEEQTILSLHSLGNKWSAIAKHHHGRDNEIKNFQNTHSKKLI  
Aco\_HBLgroup13g009340/12-345 : G-RFTEAEEKLIISLHEIVGNRWAAIASHLPGRDNEIKNYQNSWKKRLR  
Aco\_HBLgroup16g004820/84-364 : S-AFSEEEEEKLMAAHRLYGNKWAIAIRLFEGRDNAVKNHGHVIMARRKYR  
Aco\_HBLgroup23g002090/12-329 : E-GFTPAEEEHITLHAMIGSRWSIIANQLPGRTDNDIKNYQNTKSKKLR  
Aco\_HBLgroup6g005640/3-277 : R-PFTPEEDETILRAHHHGNKWATIRLISRTDNAVKNHGHVIMARRKLS  
Aco\_HBLgroup10g001000/14-264 : G-NFTDEEDLIKHLGLLGNKWSLIAGQLPGRTDNEIKNYQNTHSKKRLI  
Aco\_HBLgroup1g005280/16-303 : G-NFTPHEEGIIHQLALLGNRWAAIASYLPGRDNDIKNYQNTHSKKKIK  
Aco\_HBLgroup13g003660/14-275 : G-NISPEEQILLLELHSRWGNRWSKIARLPGRTDNEIKNYQRIRVQAHAK  
Aco\_HBLgroup11g003980/11-332 : G-SFSAQEEERLIIDVHRLGNRWAAIAKHLPGRTDNEVKNFQNSCCKKLI  
Aco\_HBLgroup5g009070/171-514 : D-TWSEEDDRIILEAMMEVGNKWAELAKRLPGRTDNEIKNHQNTATKRRQFA  
Aco\_HBLgroup19g011660/64-266 : R-AFSEGEERLLAAHQLYGNKWAIALRLFEGRTDNAVKNHGHVIMARRSR  
Aco\_HBLgroup3g004490/53-297 : G-NFTDEEDLIKHLGLLGNKWSLIAGRPLPGRTDNEIKNYQNTHSKKRL  
Aco\_HBLgroup17g010580/12-256 : G-NIPQEEEDLIIRLHKLLGNRWSLIAGRPLPGRTDNEIKNYQNTYKRVVF  
Aco\_HBLgroup7g004270/12-219 : G-MLTEAEEMLVHHLAKLGNRWSKIARLISRTDNDIKNYQNTHSKKLV  
Aco\_HBLgroup7g000370/16-355 : G-RFSFEDEEAIQLHSLVLGNKWSAIAARLPGRTDNEIKNYQNTHSKKRL  
Aco\_HBLgroup22g005280/1-1225 : G-NIPCEEEETIRLHMLGNRWSLIARLPGRTDNEIKNYQNTLAKRVD  
Aco\_HBLgroup8g001710/421-705 : R-NFNEDDEDLIKLHALLGNRWSLIAGRPLPGRTDDEVSYQNSHKKRII  
Aco\_HBLgroup17g010700/12-258 : G-NISDDEVELLIKLHKLLGNRWSLIARRLPGRDNEIKNYQNTHSKKAE  
Aco\_HBLgroup25g003080/12-231 : G-NFTAEEETIRLHEMLGNRWAAIAKLPGRTDNEIKNYQNTHSKKRLG  
Aco\_HBLgroup18g005320/12-290 : G-LLSESEERLVIDLHAQLGNRWSKIASHLPGRDNEIKNHQNTHSKKKLI  
Aco\_HBLgroup1g005410/64-362 : R-AFSEAEERLLTAHKLYGNKWAIALKLFEGRTDNAVKNHGHVIMARRHR  
Aco\_HBLgroup17g008760/16-313 : G-KFSAEEBQTIILNLSLGNKWSAIAIHLPGRTDNEIKNFQNTHSKKRLI  
Aco\_HBLgroup17g010700/12-212 : G-LLSESEENVIDLHAQLGNRWSQLARLPGRTDNEIKNHQNTHSKKLLK  
Aco\_HBLgroup9g002390/12-233 : G-NFTKEEEMTFKHELLGNRWAAIARLPGRTDNEIKNYQNTYKKKRLM  
Aco\_HBLgroup11g002620/14-204 : G-NFSHDEDELIVKLSLLATKMLVILRSLPGRDNEIKNHQNTHSKKLL  
Aco\_HBLgroup7g010980/12-334 : G-GFSEEDDRIICSYISIGSRWSIIAQLPGRTDNDIKNYQNTKPKKFL  
Aco\_HBLgroup8g002040/20-328 : G-NLTPPEEQILLLELHSKWGNRWSQLARLPGRTDNEIKNYQRIRVQAHAK  
Aco\_HBLgroup13g003150/12-316 : G-GFSDDEDRITCNFASIGSRWSIIAQLPGRTDNDIKNYQNTKPKKLM  
Aco\_HBLgroup8g005730/12-248 : G-GFTEEDDNIYAYQKIGSRWSVIAQLPGRTDNDIKNYQNTKPKKMI  
Aco\_HBLgroup9g005260/17-360 : G-KFSEDEERLIHLSLGNKWSIARSLSRTDNEIKNYQNTHSKKLL  
Aco\_HBLgroup1g003700/12-401 : G-SFSQEEENLIELHVLGNRWSQLARLPGRTDNEIKNFQNSCCKKRLR  
Aco\_HBLgroup16g004940/133-411 : S-AFSEEEEEKLMAAHRLYGNKWAIAIRLFEGRDNAVKNHGHVIMARRKYR  
Aco\_HBLgroup17g010750/12-215 : G-NIPQDEEDLIIRLHKLLGNRWSLIAGRPLPGRTDNEIKNYQNTYKRVVF  
Aco\_HBLgroup19g008140/12-418 : G-TFSQEEEKLIIVLHVLGNRWSQLARLPGRTDNEIKNLQNSCCKKRLR  
Aco\_HBLgroup22g001340/2-235 : S-PFTEEEERLLASHRIHGNRWAAIARLFEGRDNAVKNHGHVIMARRCR  
Aco\_HBLgroup25g001110/12-341 : G-DFDDEEDRIICTFASIGSRWSIIASHLPGRDNDIKNYQNTKPKKLL  
Aco\_HBLgroup25g004340/13-355 : G-TFSLQEEGIIIMKLHMLGNKWSRIARMLPGRTDNEVKNHQNSYKKKVL  
Aco\_HBLgroup16g004760/79-411 : G-KFSIQEEQTIILHALLGNRWAAIATHLPKRTDNEIKNYQNTHSKKRLA  
Aco\_HBLgroup25g006490/14-288 : G-NFTKEEERLIKLNLLGNRWSKIASFPLPGRTDNEIKNYQNTHSKKKIA  
Aco\_HBLgroup22g004000/31-467 : G-CWSTEEDMLCEAQKIFGNRWAAIAKVITGRDNAVKNRSTLCKKRAK  
Aco\_HBLgroup14g001220/40-460 : G-AIPQEEEDKTIQLHMLGNKWAIAARLPGRTDNEIKNYQNTKPKKRLI  
Aco\_HBLgroup21g007210/3-276 : R-PFTPDDEDAIVRAHRRFGKNAIARLISRTDNEIKNHQNTATKRRYL  
Aco\_HBLgroup13g005490/42-270 : K-PFTPEEDSKLIELHRKYHNGATIAIRHMEGRSDNAIKNYQNTCKKNSQR  
Aco\_HBLgroup2g003160/39-479 : C-PFSPEEBQIVAEHLAQLGNKWARMATOTLGRDNEIKNYQNTKPKRQQR  
Aco\_HBLgroup9g010670/13-298 : G-MLSQAEEETVINLHAAWGNKWSQIARHLPGRDNEVKNHQNSYKKKVL  
Aco\_HBLgroup4g000300/3-257 : G-NIPPEEQILLLELHCRWGNRWSKIARLYLPGRDNEIKNYQRIRVQAHAK  
Aco\_HBLgroup20g008650/16-347 : G-RFSEDEEKLIHLSVLGNKWSIATRLPGRTDNEIKNYQNTHSKKLL  
Aco\_HBLgroup23g008830/2-235 : S-PFTEEEERLLASHRIHGNRWAAIARLFEGRDNAVKNHGHVIMARRCR  
Aco\_HBLgroup19g010220/10-257 : R-PFTPAEDAAIVAAHQAQGNKWAIAIRLPGRTDNEIKNHQNTATKRRRR  
Aco\_HBLgroup2g000460/60-369 : K-PFTEEDDRIILISAHAHGNKWAIAIRLFEGRDNEIKNHQNTATKRRCF  
Aco\_HBLgroup9g004500/23-269 : G-NISSEDEDLIRLHNLGNRWSLIAGRPLPGRTDNEIKNHQNTHSKKRSL  
Aco\_HBLgroup21g003230/25-397 : G-PFRPDEERLIRLHALLGNKWAIRSSHLPGRDNEIKNYQNTKPKRRQR  
Aco\_HBLgroup9g004120/16-270 : G-NFTDQEEKLIHQLALLGNRWAAIASYLPERTDNDIKNYQNTYKKKLM  
Aco\_HBLgroup25g002270/16-279 : G-KIPQEEENLIELHALLGNRWAAIARSLSLPGRDNEIKNYQNTYKYSKP  
Aco\_HBLgroup6g005750/12-364 : G-TFSQEEENLIELHVLGNRWSQLARLPGRTDNEIKNLQNSCCKKRLR  
Aco\_HBLgroup6g004420/12-272 : G-DFSPEEDKTIICSYISIGSRWSIIAQLPGRTDNDVKNYQNTKPKKRL  
Aco\_HBLgroup2g007150/12-361 : G-SFSQEEESLIELHALLGNRWSQLARLPGRTDNEIKNFQNSCCKKRLR  
Aco\_HBLgroup23g004210/12-325 : G-NISQEEETITLHATFGNRWAAIATHLPGRDNEIKNFQNSHLSSTH  
Aco\_HBLgroup16g005090/16-270 : G-NFTDQEEKLIHQLALLGNRWAAIASYLPERTDNDIKNYQNTYKKKLM  
Aco\_HBLgroup9g006470/111-416 : GCKFSAEERVVELLQAQLGNKWAIRIATYLPGRDNDVKNFQNSTQKRLAR  
Aco\_HBLgroup2g004610/45-277 : G-NIPQEEQILLLELHSLWGNKWSKIAQLPGRTDNEIKNYQRIRVQAHAK  
Aco\_HBLgroup17g010710/12-215 : G-NIPQDEEDLIIRLHKLLGNRWSLIAGRPLPGRTDNEIKNYQNTKPKRVH  
Aco\_HBLgroup20g008660/17-347 : G-KFSKEEEKLIINLSLGNKWSIARLPGRTDNEIKNFQNTHSKKRL  
Aco\_HBLgroup24g000350/13-281 : G-SFSQEEEDLIISLHGILGNRWSQLASQLPGRTDNEIKNFQNSCCKKLV  
Aco\_HBLgroup17g007460/16-317 : G-KFSLQEEQTIILHALLGNRWAAIATHLPKRTDNEIKNYQNTHSKKRLA  
Aco\_HBLgroup1g005020/19-131 : D-PMSPEDAEIIVLHAILGNKWAIAVQ-----FIMILR

C

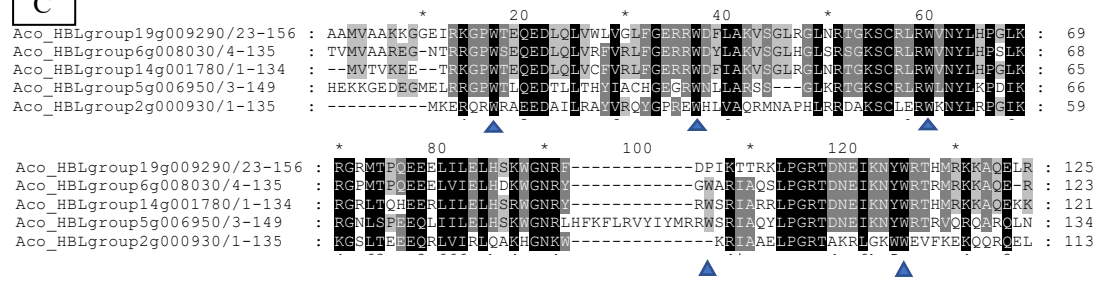

**Supplementary Figure S2** Multiple sequence alignment of the AbR2R3-MYB conserved domain in *Ananas comosus* var. *bracteatus*. The shading of the alignment represents different degrees of conservation among sequences; the dark shading indicates identical residues, the light shading indicates conservative changes. The positions of the three  $\alpha$ -helices that form each R2 (A) and R3 (B) repeat are marked as Helix 1 to Helix 3. (C), few insertions and deletions in 5 AbR2R3-MYBs, the blue triangles indicate the highly conserved tryptophan residues (W) in the MYB domain.

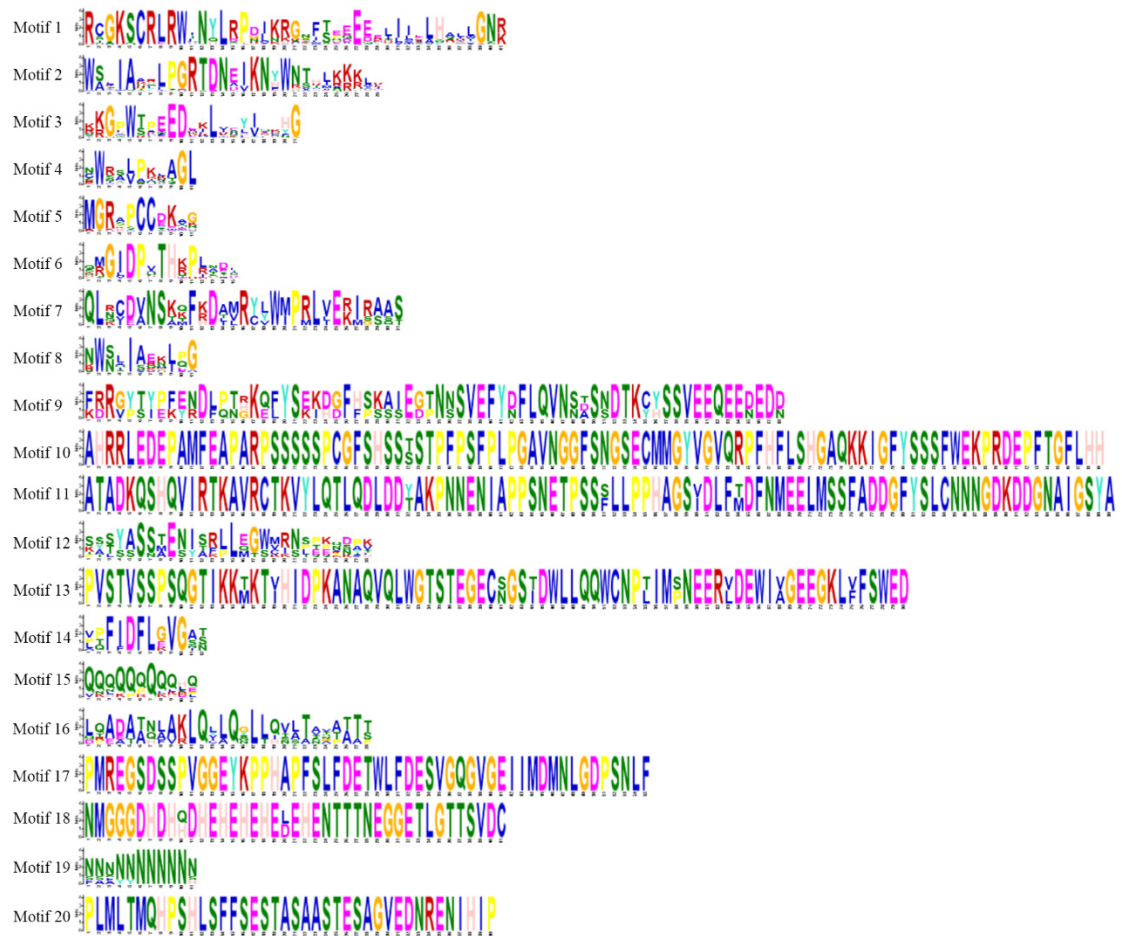

**Supplementary Figure S3** A total of 20 conserved motifs were screened and visualized with different colors by using the MEME server.

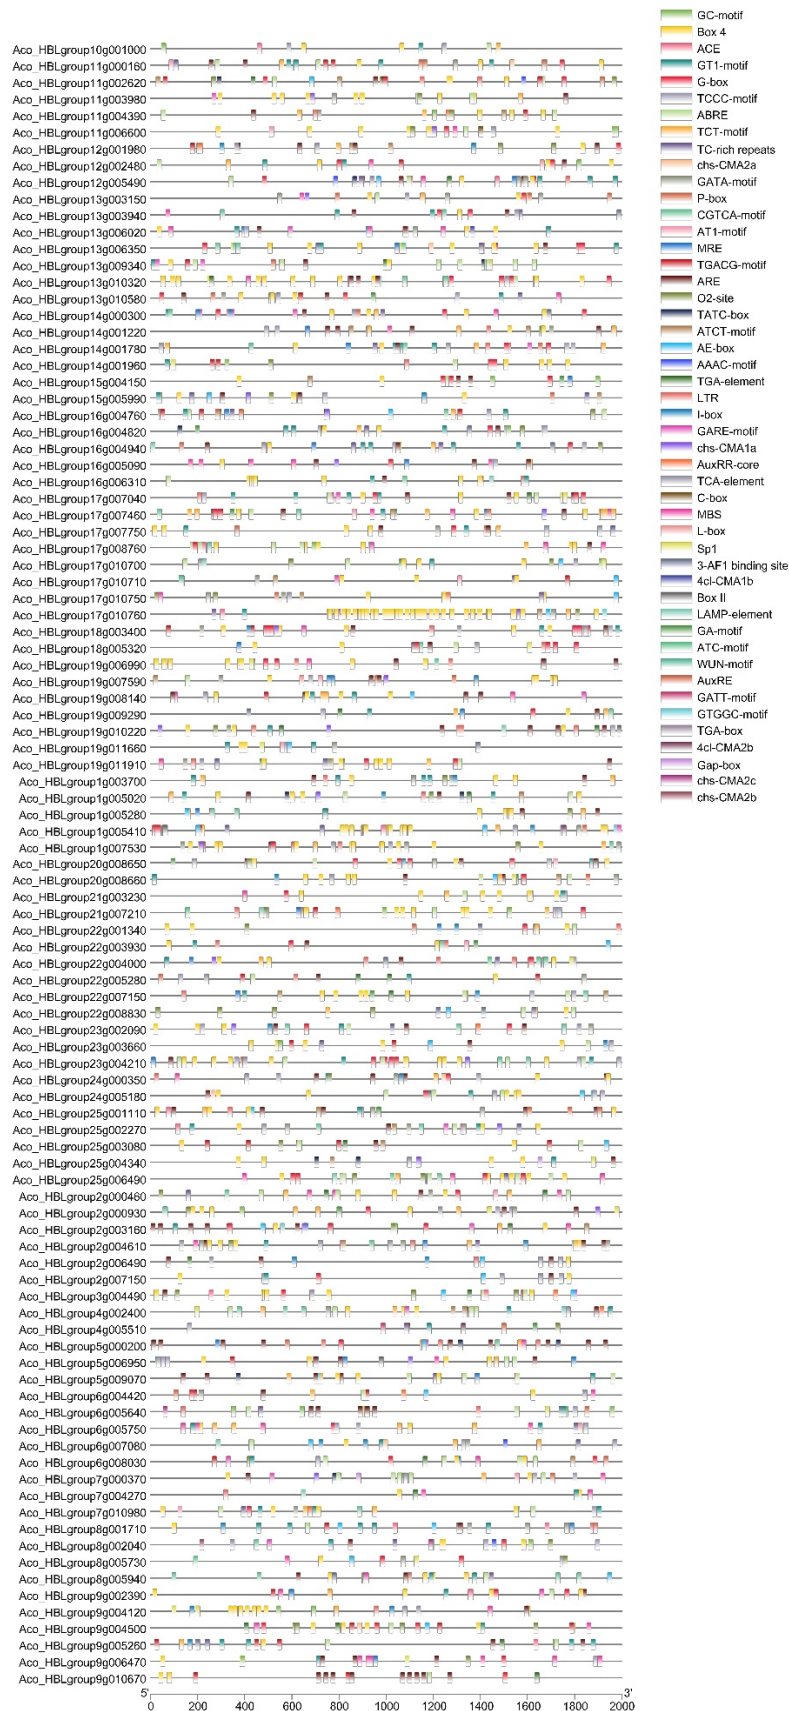

**Supplementary Figure S4** Identified pivotal *cis*-elements in the promoters of AbR2R3-MYB genes in *A. comosus* var. *bracteatus*. The black line represents the upstream of the AbR2R3-MYB genes. Different colored boxes represent different *cis*-elements.





**Table S1.** List of AbR2R3-MYB protein family genes and their physiochemical properties.

| <b>Genome ID</b>      | <b>CDS/bp</b> | <b>ORF/aa</b> | <b>MW/kD</b> | <b>pI</b> | <b>GRAVY</b> | <b>Subcellular localizations</b> |
|-----------------------|---------------|---------------|--------------|-----------|--------------|----------------------------------|
| Aco_HBLgroup15g004150 | 708           | 235           | 26077.02     | 10.44     | -0.536       | Nucleus                          |
| Aco_HBLgroup8g001710  | 2115          | 704           | 76880.84     | 8.05      | -0.266       | Nucleus                          |
| Aco_HBLgroup15g005990 | 810           | 269           | 30218.3      | 5.07      | -0.729       | Nucleus                          |
| Aco_HBLgroup13g010580 | 771           | 256           | 29315        | 6.95      | -0.748       | Nucleus                          |
| Aco_HBLgroup1g005020  | 396           | 131           | 15032.47     | 9.6       | -0.411       | Nucleus                          |
| Aco_HBLgroup2g003160  | 1596          | 531           | 58719.61     | 4.79      | -0.75        | Nucleus                          |
| Aco_HBLgroup16g004760 | 1230          | 409           | 44995.59     | 8.69      | -0.438       | Nucleus                          |
| Aco_HBLgroup16g004820 | 1095          | 364           | 41056.51     | 6.31      | -0.795       | Nucleus                          |
| Aco_HBLgroup18g003400 | 867           | 288           | 31579.35     | 5.59      | -0.577       | Nucleus                          |
| Aco_HBLgroup16g006310 | 951           | 316           | 35491.63     | 5.39      | -0.693       | Nucleus                          |
| Aco_HBLgroup19g006990 | 1035          | 344           | 38962.26     | 5.29      | -0.924       | Nucleus                          |
| Aco_HBLgroup24g000350 | 846           | 281           | 31607.94     | 5.49      | -0.656       | Nucleus                          |
| Aco_HBLgroup14g001780 | 792           | 263           | 30568.3      | 8.43      | -0.996       | Nucleus                          |
| Aco_HBLgroup2g006490  | 477           | 158           | 18291.49     | 10.44     | -0.508       | Nucleus                          |
| Aco_HBLgroup23g004210 | 978           | 325           | 35838.72     | 4.89      | -0.718       | Nucleus                          |
| Aco_HBLgroup8g002040  | 987           | 328           | 36656.88     | 6.89      | -0.63        | Nucleus                          |
| Aco_HBLgroup23g002090 | 990           | 329           | 36305.6      | 6.21      | -0.603       | Nucleus                          |
| Aco_HBLgroup19g010220 | 774           | 257           | 27959.12     | 5.54      | -0.652       | Nucleus                          |
| Aco_HBLgroup11g006600 | 1353          | 450           | 51160.6      | 6.56      | -0.743       | Nucleus                          |
| Aco_HBLgroup22g004000 | 1428          | 475           | 52547.4      | 5.16      | -0.633       | Nucleus                          |
| Aco_HBLgroup8g005940  | 933           | 310           | 34432.3      | 6.95      | -0.823       | Nucleus                          |
| Aco_HBLgroup25g006490 | 867           | 288           | 32426.22     | 5.84      | -0.85        | Nucleus                          |
| Aco_HBLgroup6g005750  | 1095          | 364           | 40837.44     | 5.79      | -0.678       | Nucleus                          |



|                       |      |     |           |      |        |         |
|-----------------------|------|-----|-----------|------|--------|---------|
| Aco_HBLgroup1g007530  | 1287 | 428 | 48196.82  | 6.96 | -0.794 | Nucleus |
| Aco_HBLgroup5g006950  | 924  | 307 | 35109.25  | 7.15 | -0.685 | Nucleus |
| Aco_HBLgroup22g008830 | 708  | 235 | 27607.65  | 8.62 | -1.054 | Nucleus |
| Aco_HBLgroup13g003150 | 951  | 316 | 34510.72  | 8.59 | -0.632 | Nucleus |
| Aco_HBLgroup25g003080 | 696  | 231 | 26168.24  | 5.8  | -0.694 | Nucleus |
| Aco_HBLgroup25g004340 | 1068 | 355 | 39374.68  | 5.56 | -0.534 | Nucleus |
| Aco_HBLgroup12g001980 | 768  | 255 | 28294.17  | 8.65 | -0.478 | Nucleus |
| Aco_HBLgroup19g007590 | 837  | 278 | 31380.09  | 6.08 | -0.687 | Nucleus |
| Aco_HBLgroup1g003700  | 1206 | 401 | 44796.21  | 6.7  | -0.638 | Nucleus |
| Aco_HBLgroup2g000460  | 1110 | 369 | 39808.37  | 5.97 | -0.545 | Nucleus |
| Aco_HBLgroup7g000370  | 1062 | 353 | 40028.92  | 5.78 | -0.645 | Nucleus |
| Aco_HBLgroup12g005490 | 813  | 270 | 30839.69  | 8.87 | -0.973 | Nucleus |
| Aco_HBLgroup18g005320 | 873  | 290 | 32747.74  | 5.13 | -0.742 | Nucleus |
| Aco_HBLgroup10g001000 | 792  | 263 | 29573.62  | 8.19 | -0.654 | Nucleus |
| Aco_HBLgroup3g004490  | 891  | 296 | 34114.54  | 8.06 | -0.59  | Nucleus |
| Aco_HBLgroup22g007150 | 1017 | 338 | 37214.59  | 5.43 | -0.585 | Nucleus |
| Aco_HBLgroup7g010980  | 1005 | 334 | 37000     | 7.56 | -0.508 | Nucleus |
| Aco_HBLgroup22g005280 | 678  | 225 | 26073.58  | 8.67 | -0.819 | Nucleus |
| Aco_HBLgroup14g001960 | 1578 | 525 | 58691.49  | 8.8  | -0.67  | Nucleus |
| Aco_HBLgroup19g008140 | 1257 | 418 | 45961.82  | 5.91 | -0.707 | Nucleus |
| Aco_HBLgroup7g004270  | 660  | 219 | 24721.98  | 6.14 | -0.632 | Nucleus |
| Aco_HBLgroup14g000300 | 774  | 257 | 29394.99  | 5.76 | -0.656 | Nucleus |
| Aco_HBLgroup6g005640  | 834  | 277 | 29452.73  | 7.22 | -0.538 | Nucleus |
| Aco_HBLgroup8g005730  | 747  | 248 | 27722.21  | 6.24 | -0.66  | Nucleus |
| Aco_HBLgroup21g003230 | 1329 | 442 | 46707.24  | 6.32 | -0.422 | Nucleus |
| Aco_HBLgroup5g000200  | 2925 | 974 | 108600.75 | 5.06 | -0.621 | Nucleus |

|                       |      |     |          |      |        |         |
|-----------------------|------|-----|----------|------|--------|---------|
| Aco_HBLgroup20g008660 | 1038 | 345 | 37119.14 | 8.93 | -0.322 | Nucleus |
| Aco_HBLgroup24g005180 | 588  | 195 | 22783.38 | 5.53 | -0.867 | Nucleus |
| Aco_HBLgroup9g010670  | 897  | 298 | 32362.82 | 5.94 | -0.532 | Nucleus |
| Aco_HBLgroup9g002390  | 702  | 233 | 26854.63 | 6.92 | -0.617 | Nucleus |
| Aco_HBLgroup5g009070  | 1545 | 514 | 57568.58 | 5.89 | -0.628 | Nucleus |
| Aco_HBLgroup11g002620 | 612  | 203 | 23283.64 | 8.78 | -0.716 | Nucleus |
| Aco_HBLgroup17g007750 | 945  | 314 | 34547.39 | 6.33 | -0.729 | Nucleus |
| Aco_HBLgroup23g003660 | 828  | 275 | 31455.08 | 5.18 | -0.76  | Nucleus |
| Aco_HBLgroup17g007460 | 948  | 315 | 34534.59 | 6.68 | -0.628 | Nucleus |
| Aco_HBLgroup6g004420  | 819  | 272 | 30524.36 | 7.58 | -0.624 | Nucleus |
| Aco_HBLgroup9g005260  | 1077 | 358 | 39318.59 | 6.06 | -0.265 | Nucleus |
| Aco_HBLgroup22g001340 | 708  | 235 | 27599.54 | 6.77 | -1.054 | Nucleus |
| Aco_HBLgroup19g009290 | 834  | 277 | 31319.75 | 5.46 | -0.878 | Nucleus |
| Aco_HBLgroup1g005280  | 906  | 301 | 33498.56 | 6.09 | -0.621 | Nucleus |
| Aco_HBLgroup19g011910 | 879  | 292 | 32761.64 | 5.87 | -0.695 | Nucleus |
| Aco_HBLgroup21g007210 | 831  | 276 | 29571.3  | 8.49 | -0.582 | Nucleus |
| Aco_HBLgroup9g004120  | 807  | 268 | 29839.42 | 6.54 | -0.705 | Nucleus |
| Aco_HBLgroup14g001220 | 1623 | 540 | 59492.37 | 5.28 | -0.528 | Nucleus |
| Aco_HBLgroup2g007150  | 1086 | 361 | 39526.02 | 5.38 | -0.673 | Nucleus |
| Aco_HBLgroup22g003930 | 849  | 282 | 31049.75 | 5.31 | -0.479 | Nucleus |
| Aco_HBLgroup17g010700 | 777  | 258 | 29364.85 | 7.59 | -0.873 | Nucleus |
| Aco_HBLgroup13g003940 | 831  | 276 | 30461.8  | 5.99 | -0.623 | Nucleus |
| Aco_HBLgroup12g002480 | 933  | 310 | 35132.69 | 9.23 | -0.864 | Nucleus |
| Aco_HBLgroup4g002400  | 687  | 228 | 26483.37 | 7.1  | -0.982 | Nucleus |
| Aco_HBLgroup13g006350 | 726  | 241 | 26973.35 | 7.15 | -0.777 | Nucleus |
| Aco_HBLgroup17g010750 | 648  | 215 | 24750.07 | 8.64 | -0.717 | Nucleus |

|                       |      |     |          |       |        |             |
|-----------------------|------|-----|----------|-------|--------|-------------|
| Aco_HBLgroup19g011660 | 801  | 266 | 29417.98 | 10.22 | -0.89  | Nucleus     |
| Aco_HBLgroup4g005510  | 552  | 183 | 21267.55 | 9.85  | -0.62  | Nucleus     |
| Aco_HBLgroup13g010320 | 936  | 311 | 34610.55 | 9.27  | -0.438 | Nucleus     |
| Aco_HBLgroup11g004390 | 1101 | 366 | 39443.85 | 5.79  | -0.324 | Nucleus     |
| Aco_HBLgroup9g006470  | 1251 | 416 | 45743.15 | 6.36  | -0.491 | Chloroplast |
| Aco_HBLgroup1g005410  | 1089 | 362 | 39468.34 | 5.6   | -0.688 | Nucleus     |
| Aco_HBLgroup17g007040 | 639  | 212 | 23571.74 | 7.57  | -0.423 | Nucleus     |
| Aco_HBLgroup11g003980 | 999  | 332 | 37135.86 | 6.39  | -0.567 | Nucleus     |
| Aco_HBLgroup17g010760 | 777  | 258 | 29341.87 | 7     | -0.851 | Nucleus     |
| Aco_HBLgroup13g006020 | 675  | 224 | 25607.68 | 9.02  | -0.603 | Nucleus     |
| Aco_HBLgroup25g001110 | 1026 | 341 | 37559.32 | 6.99  | -0.83  | Nucleus     |
| Aco_HBLgroup17g008760 | 936  | 311 | 34591.95 | 5.83  | -0.462 | Nucleus     |
| Aco_HBLgroup20g008650 | 1038 | 345 | 37745.54 | 5.99  | -0.446 | Nucleus     |
| Aco_HBLgroup6g008030  | 720  | 239 | 27437.65 | 5.73  | -0.843 | Nucleus     |
| Aco_HBLgroup6g007080  | 1047 | 348 | 38148.19 | 6.6   | -0.708 | Nucleus     |
| Aco_HBLgroup16g005090 | 807  | 268 | 29853.49 | 6.96  | -0.706 | Nucleus     |
| Aco_HBLgroup25g002270 | 840  | 279 | 31907.45 | 7.79  | -1.008 | Nucleus     |
| Aco_HBLgroup9g004500  | 810  | 269 | 30410.06 | 6.51  | -0.693 | Nucleus     |
| Aco_HBLgroup2g004610  | 834  | 277 | 31665.86 | 9.11  | -0.402 | Nucleus     |
| Aco_HBLgroup11g000160 | 1077 | 358 | 39860.15 | 4.9   | -0.825 | Nucleus     |
| Aco_HBLgroup13g009340 | 1038 | 345 | 38960.62 | 5.33  | -0.634 | Nucleus     |
| Aco_HBLgroup16g004940 | 1236 | 411 | 45848.07 | 6.32  | -0.631 | Nucleus     |
| Aco_HBLgroup2g000930  | 1056 | 351 | 40173.88 | 9.86  | -0.865 | Nucleus     |
| Aco_HBLgroup17g010710 | 648  | 215 | 24674.98 | 8.25  | -0.688 | Nucleus     |

**Table S2.** Estimated Ka/Ks ratios of the duplicated R2R3-MYB genes in *Ananas comosus* var. *bracteatus*

| Gene_1                | Gene_2                | Ka       | Ks       | Ka/Ks    | Effective Length (bp) | AverageS-sites | AverageN-sites | Duplication Type |
|-----------------------|-----------------------|----------|----------|----------|-----------------------|----------------|----------------|------------------|
| Aco_HBLgroup1g008320  | Aco_HBLgroup14g001960 | 0.391894 | 1.022078 | 0.383429 | 1209                  | 264.92         | 944.08         | segmental        |
| Aco_HBLgroup1g003700  | Aco_HBLgroup19g008140 | 0.260106 | 1.962444 | 0.132542 | 1104                  | 238.42         | 865.58         | segmental        |
| Aco_HBLgroup1g005280  | Aco_HBLgroup19g011910 | 0.254155 | 1.583335 | 0.160519 | 834                   | 185.33         | 648.67         | segmental        |
| Aco_HBLgroup1g005410  | Aco_HBLgroup19g011660 | 0.415646 | 1.091040 | 0.380963 | 771                   | 168.00         | 603.00         | segmental        |
| Aco_HBLgroup10g001000 | Aco_HBLgroup12g001980 | 0.216943 | 1.764469 | 0.122951 | 702                   | 166.75         | 535.25         | segmental        |
| Aco_HBLgroup10g001000 | Aco_HBLgroup3g004490  | 0.229569 | 2.676690 | 0.085766 | 762                   | 181.33         | 580.67         | segmental        |
| Aco_HBLgroup13g006350 | Aco_HBLgroup7g004270  | 0.338766 | 0.698805 | 0.484778 | 621                   | 141.33         | 479.67         | segmental        |
| Aco_HBLgroup13g003940 | Aco_HBLgroup9g010670  | 0.491340 | 3.734796 | 0.131557 | 795                   | 185.83         | 609.17         | segmental        |
| Aco_HBLgroup14g000300 | Aco_HBLgroup19g007590 | 0.241417 | 1.837748 | 0.131366 | 747                   | 172.92         | 574.08         | segmental        |
| Aco_HBLgroup15g004150 | Aco_HBLgroup8g005730  | 0.414147 | 1.624802 | 0.254891 | 633                   | 149.08         | 483.92         | segmental        |
| Aco_HBLgroup16g004820 | Aco_HBLgroup16g004940 | 0.005894 | 0.004335 | 1.359532 | 1083                  | 231.33         | 851.67         | tandem           |
| Aco_HBLgroup16g004760 | Aco_HBLgroup17g007460 | 0.171706 | 1.243373 | 0.138097 | 906                   | 209.33         | 696.67         | segmental        |
| Aco_HBLgroup16g005090 | Aco_HBLgroup17g007750 | 0.201515 | 1.018050 | 0.197942 | 786                   | 179.08         | 606.92         | segmental        |
| Aco_HBLgroup16g005090 | Aco_HBLgroup22g003930 | 0.340588 | 1.993741 | 0.170829 | 762                   | 173.25         | 588.75         | segmental        |
| Aco_HBLgroup16g005090 | Aco_HBLgroup9g004120  | 0.001608 | 0.016714 | 0.096217 | 804                   | 181.50         | 622.50         | segmental        |
| Aco_HBLgroup17g007040 | Aco_HBLgroup18g005320 | 0.146895 | 0.646526 | 0.227206 | 609                   | 139.25         | 469.75         | segmental        |
| Aco_HBLgroup17g008760 | Aco_HBLgroup18g003400 | 0.198171 | 1.001056 | 0.197962 | 765                   | 171.17         | 593.83         | segmental        |
| Aco_HBLgroup17g007750 | Aco_HBLgroup22g003930 | 0.244771 | 2.235645 | 0.109486 | 753                   | 172.42         | 580.58         | segmental        |
| Aco_HBLgroup17g010700 | Aco_HBLgroup22g005280 | 0.462982 | 1.698785 | 0.272537 | 591                   | 137.25         | 453.75         | segmental        |
| Aco_HBLgroup17g008760 | Aco_HBLgroup4g005510  | 0.160713 | 1.206373 | 0.133220 | 534                   | 118.08         | 415.92         | segmental        |
| Aco_HBLgroup17g007040 | Aco_HBLgroup4g001840  | 0.340427 | 1.549228 | 0.219740 | 450                   | 101.92         | 348.08         | segmental        |
| Aco_HBLgroup18g005320 | Aco_HBLgroup4g009920  | 0.356364 | 2.427242 | 0.146818 | 639                   | 141.33         | 497.67         | segmental        |

|                       |                       |          |          |          |      |        |         |           |
|-----------------------|-----------------------|----------|----------|----------|------|--------|---------|-----------|
| Aco_HBLgroup18g003400 | Aco_HBLgroup4g005510  | 0.232726 | 1.534717 | 0.151641 | 531  | 118.67 | 412.33  | segmental |
| Aco_HBLgroup18g005320 | Aco_HBLgroup4g001840  | 0.233265 | 2.022556 | 0.115332 | 453  | 102.58 | 350.42  | segmental |
| Aco_HBLgroup19g007590 | Aco_HBLgroup2g004610  | 0.276877 | 1.454797 | 0.190320 | 726  | 170.25 | 555.75  | segmental |
| Aco_HBLgroup19g006990 | Aco_HBLgroup23g004210 | 0.309376 | 1.443415 | 0.214336 | 861  | 177.58 | 683.42  | segmental |
| Aco_HBLgroup19g007590 | Aco_HBLgroup23g003660 | 0.200221 | 1.314296 | 0.152341 | 795  | 178.50 | 616.50  | segmental |
| Aco_HBLgroup2g006490  | Aco_HBLgroup2g007150  | 0.039619 | 0.153185 | 0.258634 | 381  | 83.00  | 298.00  | tandem    |
| Aco_HBLgroup22g001340 | Aco_HBLgroup22g008830 | 0.010946 | 0.019891 | 0.550297 | 705  | 152.83 | 552.17  | tandem    |
| Aco_HBLgroup22g001340 | Aco_HBLgroup4g002400  | 0.156896 | 0.988617 | 0.158703 | 639  | 138.67 | 500.33  | segmental |
| Aco_HBLgroup22g008830 | Aco_HBLgroup4g002400  | 0.146106 | 1.077750 | 0.135565 | 639  | 139.33 | 499.67  | segmental |
| Aco_HBLgroup22g001340 | Aco_HBLgroup4g009300  | 0.228640 | 1.272632 | 0.179659 | 543  | 115.50 | 427.50  | segmental |
| Aco_HBLgroup25g003080 | Aco_HBLgroup9g002390  | 0.262922 | 1.418641 | 0.185334 | 675  | 150.08 | 524.92  | segmental |
| Aco_HBLgroup4g002400  | Aco_HBLgroup4g009300  | 0.011228 | 0.024525 | 0.457802 | 573  | 124.33 | 448.67  | tandem    |
| Aco_HBLgroup5g000200  | Aco_HBLgroup8g007840  | 0.313663 | 1.117426 | 0.280701 | 2469 | 548.67 | 1920.33 | segmental |
| Aco_HBLgroup5g006950  | Aco_HBLgroup8g002040  | 0.302289 | 2.064544 | 0.146419 | 825  | 186.92 | 638.08  | segmental |

**Table S3.** Functionally annotated *cis*-elements identified in the promoters of AbR2R3-MYB genes in *Ananas comosus* var. *bracteatus*

| Categories               | <i>Cis</i> -Elements                                                                                                                                                     | Functions of <i>Cis</i> -Elements                                |
|--------------------------|--------------------------------------------------------------------------------------------------------------------------------------------------------------------------|------------------------------------------------------------------|
| Light-response elements  | Box 4, ATCT-motif, ATC-motif                                                                                                                                             | part of a conserved DNA module involved in light responsiveness  |
|                          | ACE                                                                                                                                                                      | cis-acting element involved in light responsiveness              |
|                          | GT1-motif, AAAC-motif, Sp1, 3-AF1 binding site, 4cl-CMA1b, 4cl-CMA2b                                                                                                     | light responsive element                                         |
|                          | G-Box, C-box                                                                                                                                                             | cis-acting regulatory element involved in light responsiveness   |
|                          | TCCC-motif, TCT-motif, chs-CMA2a, GATA-motif, AT1-motif, I-box, chs-CMA1a, L-box, Box II, LAMP-element, GA-motif, GATT-motif, GTGGC-motif, chs-CMA2c, chs-CMA2b, Gap-box | part of a light responsive element                               |
|                          | MRE                                                                                                                                                                      | MYB binding site involved in light responsiveness                |
| Stress-response elements | AE-box                                                                                                                                                                   | part of a module for light response                              |
|                          | GC-motif                                                                                                                                                                 | enhancer-like element involved in anoxic specific inducibility   |
|                          | TC-rich repeats                                                                                                                                                          | cis-acting element involved in defense and stress responsiveness |



|                                  |                          |                                                                            |
|----------------------------------|--------------------------|----------------------------------------------------------------------------|
| Hormone-<br>response<br>elements | ARE                      | cis-acting regulatory element<br>essential for the anaerobic<br>induction  |
|                                  | LTR                      | cis-acting element involved in<br>low-temperature responsiveness           |
|                                  | MBS                      | MYB binding site involved in<br>drought-inducibility                       |
|                                  | WUN-motif                | wound-responsive element                                                   |
|                                  | ABRE                     | cis-acting element involved in<br>the abscisic acid responsiveness         |
|                                  | P-box, GARE-motif        | gibberellin-responsive element                                             |
|                                  | TATC-box                 | cis-acting element involved in<br>gibberellin-responsiveness               |
|                                  | CGTCA-motif, TGACG-motif | cis-acting regulatory element<br>involved in the MeJA-<br>responsiveness   |
|                                  | O <sub>2</sub> -site     | cis-acting regulatory element<br>involved in zein metabolism<br>regulation |
|                                  | TGA-element              | auxin-responsive element                                                   |
|                                  | AuxRR-core               | cis-acting regulatory element<br>involved in auxin<br>responsiveness       |
|                                  | AuxRE, TGA-box           | part of an auxin-responsive<br>element                                     |

| TCA-element | cis-acting element involved in<br>salicylic acid responsiveness |
|-------------|-----------------------------------------------------------------|
|-------------|-----------------------------------------------------------------|

**Table S4.** List of primers used for qRT-PCR.

| Gene Name                    | Primer Sequences (5'-3')           |                                    |
|------------------------------|------------------------------------|------------------------------------|
| <i>Unigene.16454</i>         | Forward: TCTCACGCCCTCTTTCTTCCA     | Reverse: GCTCTAACTCGCCACGCCTTT     |
| <i>Unigene.16459</i>         | Forward: GGATTTGAAGCATCATGGCACA    | Reverse: AGCACAACCCACCTCATTTTCG    |
| <i>SDP</i>                   | Forward: TGGGCGGCGTATTTACTGTGG     | Reverse: CCAAACCTATCCTTCGCCATC     |
| <i>IDH</i>                   | Forward: GAGTCTATTCGGGCCTTTGCT     | Reverse: CCCAGACATACCCTCCCTCAC     |
| <i>Aco_HBLgroup8g001710</i>  | Forward: CTAAGCAACGCCCCGCAGTATG    | Reverse: TGGCAGGAAGAATGACGCTATCG   |
| <i>Aco_HBLgroup3g004490</i>  | Forward: CTCTCCCCAAAGCCGCAGG       | Reverse: CGACCAGCAATCAAGGACCAT     |
| <i>Aco_HBLgroup10g001000</i> | Forward: CCTCTCAATAATAAGCCTCCCG    | Reverse: CCAAGGTGGTAGCACAAGC       |
| <i>Aco_HBLgroup8g005940</i>  | Forward: CCCTACTCCTGCTCCCGCTGAAG   | Reverse: GCTGGTGCTGCTGTAGGAAGATG   |
| <i>Aco_HBLgroup22g005280</i> | Forward: TCACAAGAAGCACCAAGAACTCCTC | Reverse: ACTCCAACCTTGCCGCGAACTTAG  |
| <i>Aco_HBLgroup13g006020</i> | Forward: CCTCCTCGGCAACAAATGGTCTC   | Reverse: CCTCCTTATGTGCGTGTTCCAGTAG |
| <i>Aco_HBLgroup12g001980</i> | Forward: GGACGAAGGAGGAGGACCAGAG    | Reverse: GAAGAAGACCTGCGGCTTTGGG    |
| <i>Aco_HBLgroup17g010710</i> | Forward: TTTGATAGCGGGAAGGATACC     | Reverse: CTTGAGATGGGCTTGACACG      |
| <i>Aco_HBLgroup17g010750</i> | Forward: GAACCCACCCTTGCTCTCA       | Reverse: CGGTATCCTCCCCGCTATC       |
| <i>Aco_HBLgroup11g002620</i> | Forward: ACCACTGGAACACGCACATCA     | Reverse: CAAAAGAAGCGGCGAAATC       |
